# Supplementary material
Source: HighWire-hosted journal article supplement (https://sti.bmj.com/content/94/2/100)
Supplement: inline-supplementary-material-2 [file inline-supplementary-material-2.docx]

**Supplementary table 2A** Proportion nvCT of all detected *C. trachomatis* cases between 2007 and 2015 in two counties using
Roche and two counties using Becton Dickinson detection systems

| County | % nvCT (n nvCT/n total CT) | | |  |  |  | Trend1 |  |
| --- | --- | --- | --- | --- | --- | --- | --- | --- |
|  | 2007 | 2008 | 2009 | 2011 | 2015 | % difference 2007 – 2015 | OR per year  (95% CI) | p value |
| Roche | 56 (228/407) | 43 (201/465) | 24 (97/405) | 24 (98/404) | 6.5 (43/666) | -50 | 0.711  (0.68-0.74) | <0.01 |
| Dalarna | 65 (122/188) | 51 (104/204) | 24 (42/172) | 25 (64/253) | 6.2 (18/292) | -59 | 0.67  (0.63-0.71) | <0.01 |
| Örebro | 48 (106/219) | 37 (97/261) | 24 (55/233) | 23 (34/151) | 6.7 (25/374) | -41 | 0.73  (0.69-0.78) | <0.01 |
| BD | 19 (70/360) | 20 (93/461) | 18 (72/391) | 11 (64/559) | 5.3 (37/697) | -14 | 0.82  (0.78-0.86) | <0.01 |
| Norrbotten | 9 (10/107) | 13 (31/231) | 19 (35/185) | 11 (33/297) | 5.3 (19/361) | -4 | 0.88  (0.82-0.94) | <0.01 |
| Uppsala | 24 (60/253)2 | 27 (62/230) | 18 (37/206) | 12 (31/262) | 5.4 (18/336) | -19 | 0.79  (0.74-0.84) | <0.01 |
| All 4 counties | 40 (298/767) | 32 (294/926) | 21 (169/796) | 17 (162/963) | 5.9 (80/1363) | -34 |  |  |

1A significant interaction test (p<0.01) showing different relative trends per year between Roche and BD.

2 The time period was 14 Nov 2006 – 14 Feb 2007. In a previous study (Herrmann B, Törner A, Low N, et al. Emerg Infect Dis 2008;14:1462–5.) the proportion of nvCT was 19% (50/263) in a time period Nov 2006 – Feb 2007. This 5% difference may be due to an inaccuracy of data calculation in that study.

**Supplementary table 2B** Proportion nvCT of all detected C. trachomatis cases in different age groups
2007, 2011 and 2015 in two counties using Roche and two counties using Becton Dickinson detection systems

|  | % nvCT [95% CI] (n nvCT/n total CT) | | |
| --- | --- | --- | --- |
|  | 2007 | 2011 | 2015 |
| Roche |  |  |  |
| 15-19 | 64.8 [56.8-72.2] (103/159) | 32.9 [22.7-44.4] (26/79) | 4.7 [1.3-11.6] (4/85) |
| 20-24 | 50.3 [42.1-58.6] (76/151) | 22.6 [17.2-28.9] (48/212) | 3.9 [2.0-6.7] (12/308) |
| 25-29 | 52.5 [39.1-65.7] (31/59) | 18.8 [10.1-30.5] (12/64) | 6.4 [3.1-11.5] (10/156) |
| ≥30 | 48.3 [29.4-67.5] (14/29) | 24.5 [13.3-38.9] (12/49) | 14.9 [8.9-22.8] (17/114) |
| All ages | 56.3 [51.3-61.2] (224/398) | 24.3 [20.2-28.7] (98/404) | 6.5 [4.7-8.6] (43/663) |
|  |  |  |  |
| BD |  |  |  |
| 15-19 | 16.3 [9.4-25.5] (15/92) | 10.3 [5.6-17.0] (13/126) | 4.1 [1.5-8.7] (6/147) |
| 20-24 | 23.6 [17.4-30.9] (39/165) | 14.9 [10.7-20.0] (37/248) | 7.1 [4.6-10.5] (23/323) |
| 25-29 | 15.0 [7.1-26.6] (9/60) | 7.8 [3.6-14.2] (9/116) | 4.0 [1.3-9.1] (5/125) |
| ≥30 | 15.4 [5.9-30.5] (6/39) | 7.2 [2.4-16.1] (5/69) | 3.1 [0.6-8.7] (3/98) |
| All ages | 19.4 [15.4-23.9] (69/356) | 11.4 [8.9-14.4] (64/559) | 5.3 [3.8-7.3] (37/693) |
